# Supplementary material for: Enrichment of HP1a on Drosophila Chromosome 4 Genes Creates an Alternate Chromatin Structure Critical for Regulation in this Heterochromatic Domain
Source: PLOS journal article supplement (doi:10.1371/journal.pgen.1002954), 2012-09-20
Supplement: S6 (10.1371/journal.pgen.1002954.s006) [file journal.pgen.1002954.s006]

**a** BG3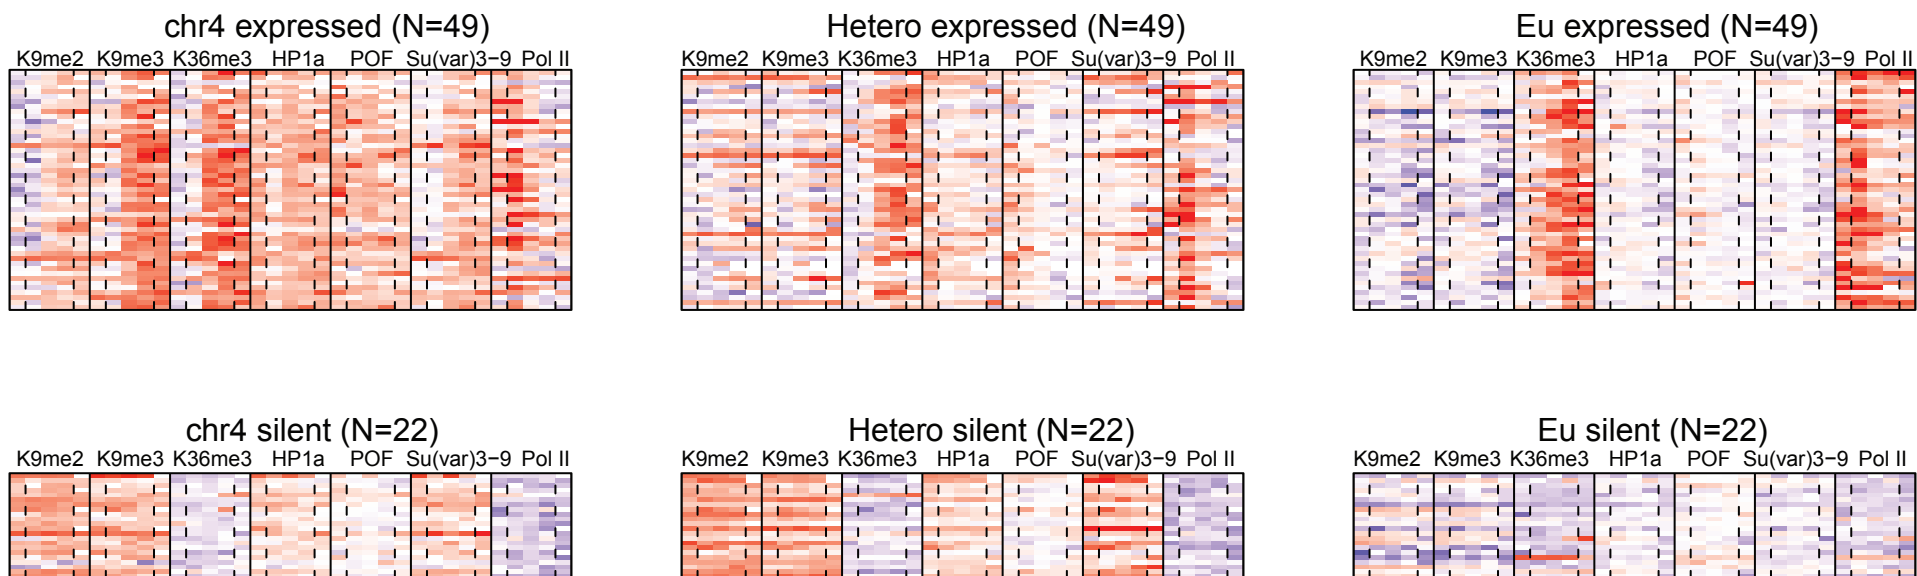**b** S2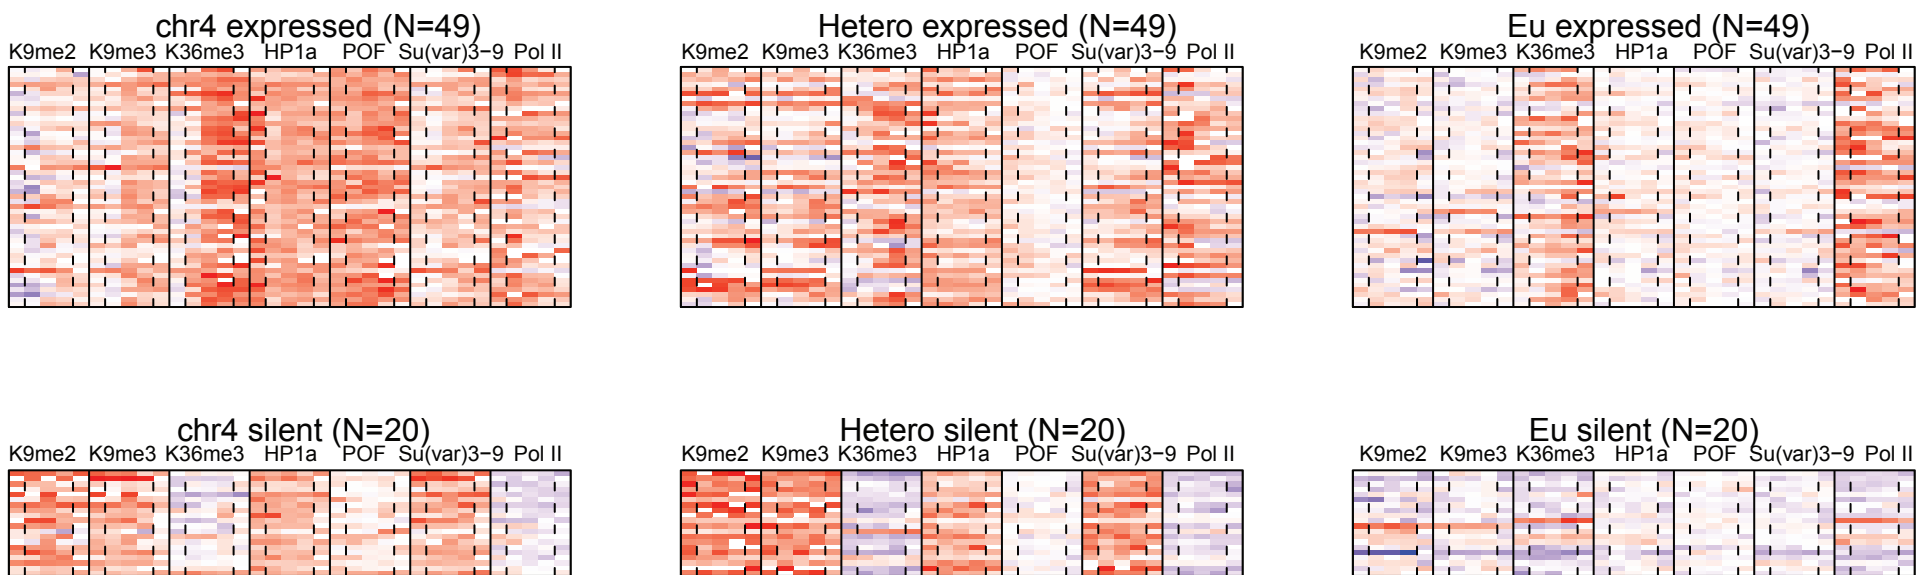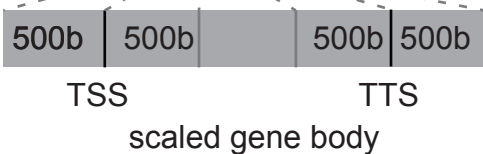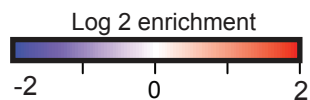**Figure S6**
