# Supplementary material for: Enrichment of HP1a on Drosophila Chromosome 4 Genes Creates an Alternate Chromatin Structure Critical for Regulation in this Heterochromatic Domain
Source: PLOS journal article supplement (doi:10.1371/journal.pgen.1002954), 2012-09-20

Figure S16

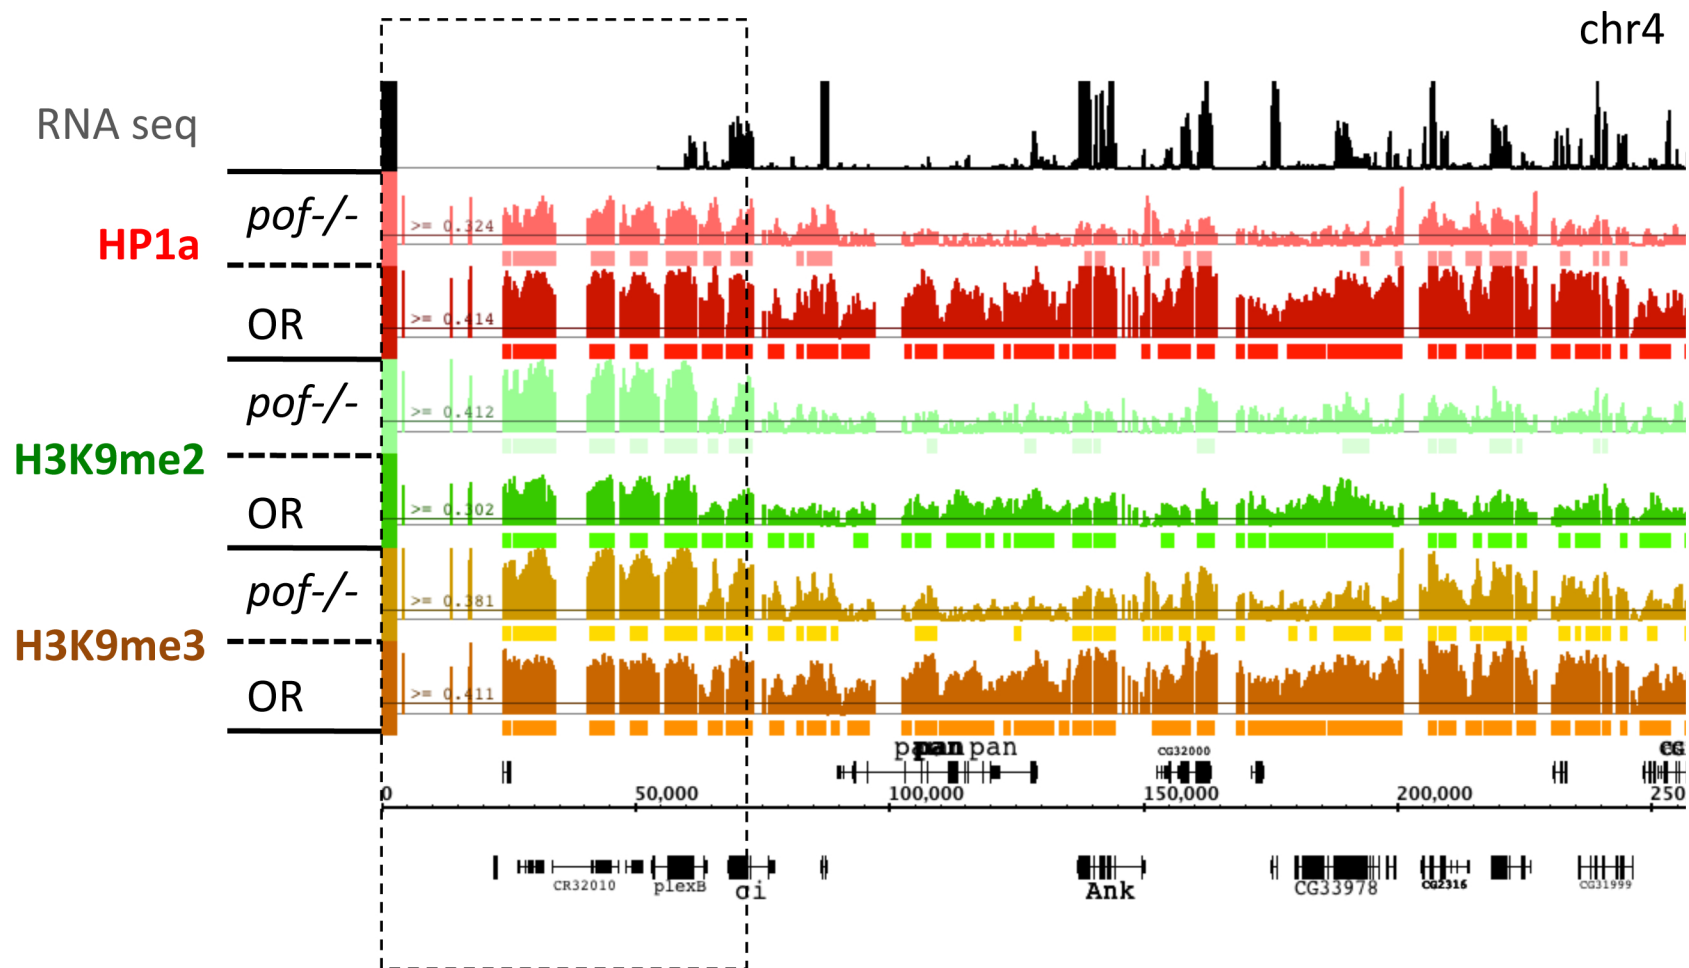

Supplement: S16 (10.1371/journal.pgen.1002954.s016) [file journal.pgen.1002954.s016]
